# Supplementary material
Source: Elsevier journal article supplement (https://authors.library.caltech.edu/56739/2/mmc1.pdf)
Supplement: mmc1 [file mmc1.pdf]

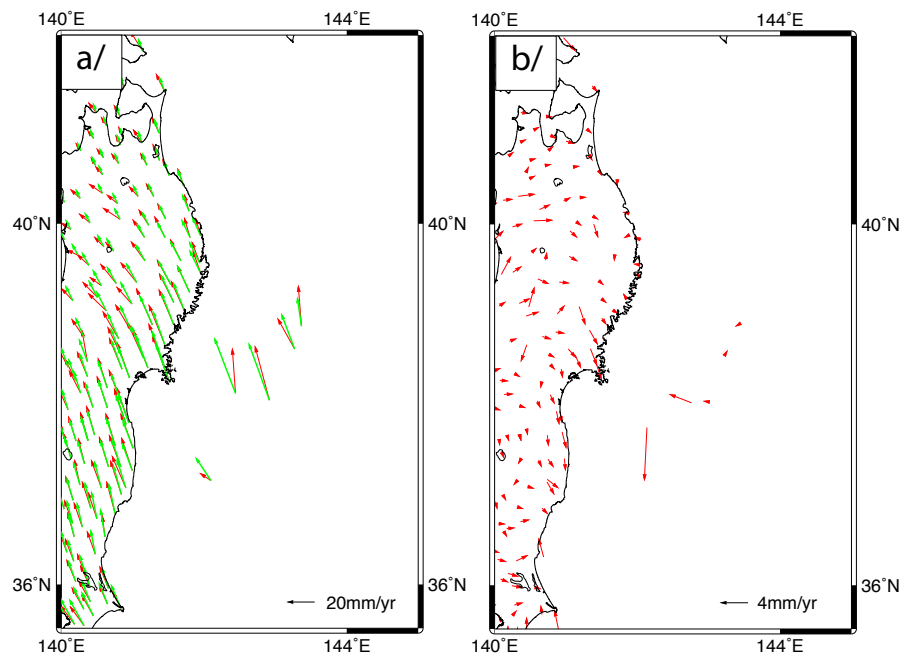

Figure 1: a/ Interseismic velocity map predicted by LT model, corresponding to a partially to fully Locked Trench prior to the mainshock (green). Data are shown in red. b/ Residual velocity map (normalized by the uncertainties).
